# Supplementary material for: Collagen type II–hyaluronan interactions – the effect of proline hydroxylation: a molecular dynamics study
Source: Royal Society of Chemistry journal article supplement (doi:10.1039/d2tb01550a), 2022-01-01
Supplement: d2tb01550a1.pdf [file d2tb01550a1.pdf]

## Supplementary Information

### **Collagen Type II – Hyaluronan interactions – effect of proline hydroxylation: molecular dynamics study**

Piotr Bełdowski <sup>\*a</sup>, Maciej Przybyłek <sup>b</sup>, Damian Bełdowski <sup>c</sup>, Andra Dedinaite <sup>d,e</sup>,

Alina Sionkowska <sup>f</sup>, Piotr Cysewski <sup>b</sup> and Per M. Claesson <sup>d</sup>

<sup>a</sup> *Institute of Mathematics and Physics, Bydgoszcz University of Science and Technology, al, Kaliskiego 7, 85-796 Bydgoszcz, Poland,*

<sup>b</sup> *Department of Physical Chemistry, Pharmacy Faculty, Collegium Medicum of Bydgoszcz, Nicolaus Copernicus University in Toruń, Kurpińskiego 5, 85-950 Bydgoszcz, Poland*

<sup>c</sup> *Institute of Mathematics, Jagiellonian University, ul, Lukaszewicza 6, 30-348 Kraków, Poland*

<sup>d</sup> *Division of Surface and Corrosion Science, Department of Chemistry, School of Engineering Sciences in Chemistry, Biotechnology and Health, KTH Royal Institute of Technology, SE-100 44 Stockholm, Sweden*

<sup>e</sup> *KTH Royal Institute of Technology, School of Engineering Sciences in Chemistry, Biotechnology and Health, Engineering Pedagogics, SE-100 44 Stockholm, Sweden*

<sup>f</sup> *Department of Biomaterials and Cosmetics Chemistry, Faculty of Chemistry, Nicolaus Copernicus University in Toruń, Gagarin 7, 87-100 Toruń, Poland*

#### Table of content

|                                                                                                                                                                                                                                                                                                                                                                       |   |
|-----------------------------------------------------------------------------------------------------------------------------------------------------------------------------------------------------------------------------------------------------------------------------------------------------------------------------------------------------------------------|---|
| <b>Fig. S1.</b> The oxygen atoms numbering in disaccharide unit of hyaluronan, GCU denotes D-glucuronic acid moiety with ionized carboxyl group, NAG stands for N-acetyl-D-glucosamine. ....                                                                                                                                                                          | 3 |
| <b>Fig. S2.</b> Boxplot of distribution of free energy of binding for different HD for 3HYP (A) and 4HYP (B).....                                                                                                                                                                                                                                                     | 3 |
| <b>Table S1.</b> The combinations of collagen sequences corresponding to a particular hydroxylation degree (HD). The first letter denotes chain (A, B or C) and the number to the position in the primary structure. ....                                                                                                                                             | 4 |
| <b>Description for Tables S2-S13</b> .....                                                                                                                                                                                                                                                                                                                            | 5 |
| <b>Table S2</b> Distribution of H-bonds between HA and collagen amino acid atoms for HD=0. Percentages represent a contributions of H-bonds identified between HA and a given amino acid residue The numbering of atoms is presented in “Description for Tables S2-S13” section (atoms O3 and O7 in HA did not form any H-bonds with collagen).5                      | 5 |
| <b>Table S3</b> Distribution of H-bonds between HA and collagen amino acid atoms for HD=1 (3HYP). Percentages represent a contributions of H-bonds identified between HA and a given amino acid residue. The numbering of atoms is presented in “Description for Tables S2-S13” section on page 5 (atoms O3 and O7 in HA did not form any H-bonds with collagen)..... | 6 |

|                                                                                                                                                                                                                                                                                                                                                                       |    |
|-----------------------------------------------------------------------------------------------------------------------------------------------------------------------------------------------------------------------------------------------------------------------------------------------------------------------------------------------------------------------|----|
| <b>Table S4</b> Distribution of H-bonds between HA and collagen amino acid atoms for HD=1 (4HYP). Percentages represent a contributions of H-bonds identified between HA and a given amino acid residue. The numbering of atoms is presented in “Description for Tables S2-S13” section on page 5 (atoms O3 and O7 in HA did not form any H-bonds with collagen)..... | 6  |
| <b>Table S5</b> H-bonds lengths [nm] between HA and collagen amino acid atoms for HD=0. The numbering of atoms is presented in “Description for Tables S2-S13” section on page 5 (atoms O3 and O7 in HA did not form any H-bonds with collagen). In the parentheses the standard deviation values were provided. ....                                                 | 7  |
| <b>Table S6</b> H-bonds lengths [nm] between HA and collagen amino acid atoms for HD=1 (3HYP). The numbering of atoms is presented in “Description for Tables S2-S13” section on page 5 (atoms O3 and O7 in HA did not form any H-bonds with collagen). In the parentheses the standard deviation values were provided.....                                           | 8  |
| <b>Table S7</b> H-bonds lengths [nm] between HA and collagen amino acid atoms for HD=1 (4HYP). The numbering of atoms is presented in “Description for Tables S2-S13” section on page 5 (atoms O3 and O7 in HA did not form any H-bonds with collagen). In the parentheses the standard deviation values were provided.....                                           | 8  |
| <b>Table S8</b> Energies of H-bonds [kJ/mol] between HA and given collagen amino acid residue atom for HD=0. The numbering of atoms is presented in “Description for Tables S2-S13” section on page 5 (atoms O3 and O7 in HA did not form any H-bonds with collagen). In the parentheses the standard deviation values were provided.....                             | 9  |
| <b>Table S9</b> Energies of H-bonds [kJ/mol] between HA and given collagen amino acid residue atom for HD=1 (3HYP). The numbering of atoms is presented in “Description for Tables S2-S13” section on page 5 (atoms O3 and O7 in HA did not form any H-bonds with collagen). In the parentheses the standard deviation values were provided.....                      | 10 |
| <b>Table S10</b> Energies of H-bonds [kJ/mol] between HA and given collagen amino acid residue atom for HD=1 (4HYP). The numbering of atoms is presented in “Description for Tables S2-S13” section on page 5 (atoms O3 and O7 in HA did not form any H-bonds with collagen). In the parentheses the standard deviation values were provided.....                     | 10 |
| <b>Table S11</b> The H-bonds acceptor-donor frequency analysis. Values in cells represent how often HA in a given interaction plays the role of acceptor for HD=0. The numbering of atoms is presented in “Description for Tables S2-S13” section on page 5.....                                                                                                      | 11 |
| <b>Table S12</b> The H-bonds acceptor-donor frequency analysis. Values in cells represent how often HA in a given interaction plays the role of acceptor for HD=1 (3HYP). The numbering of atoms is presented in “Description for Tables S2-S13” section on page 5.....                                                                                               | 12 |
| <b>Table S13</b> The H-bonds acceptor-donor frequency analysis. Values in cells represent how often HA in a given interaction plays the role of acceptor for HD=1 (4HYP). The numbering of atoms is presented in “Description for Tables S2-S13” section on page 5.....                                                                                               | 12 |

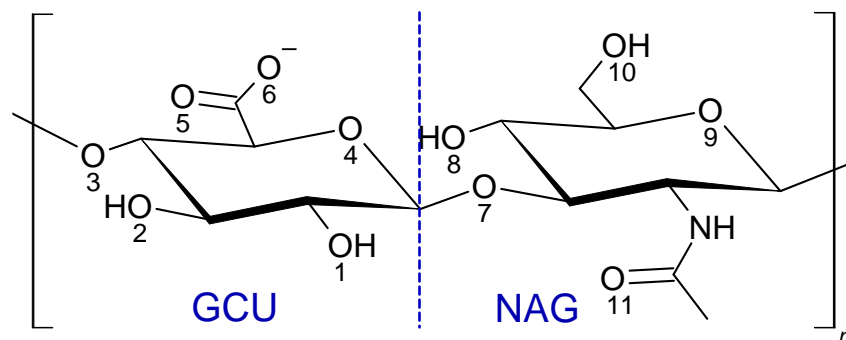

**Fig. S1.** The oxygen atoms numbering in disaccharide unit of hyaluronan, GCU denotes D-glucuronic acid moiety with ionized carboxyl group, NAG stands for N-acetyl-D-glucosamine.

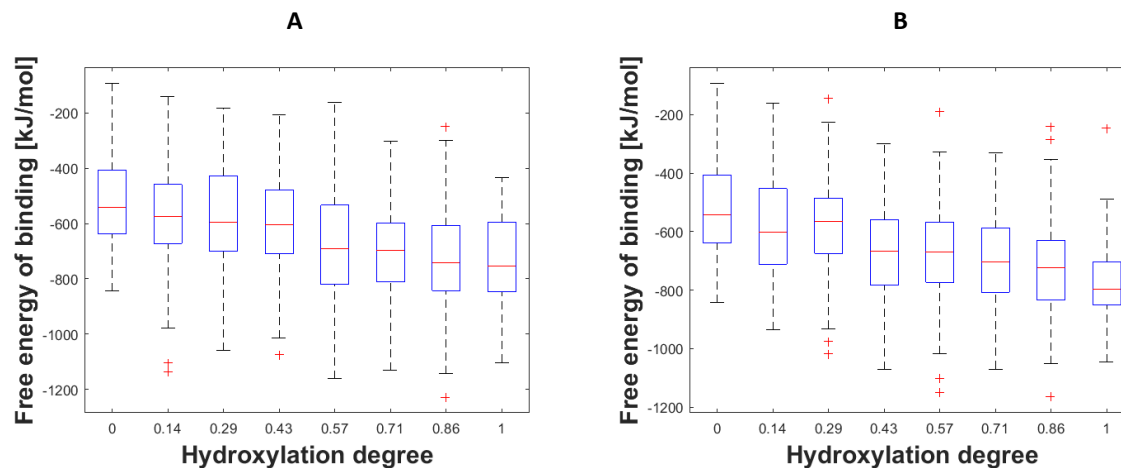

**Fig. S2.** Boxplot of distribution of free energy of binding for different HD for 3HYP (A) and 4HYP (B).

**Table S1.** The combinations of collagen sequences corresponding to a particular hydroxylation degree (HD). The first letter denotes chain (A, B or C) and the number to the position in the primary structure.

| HD   | Sequences                                                                                                                                                                                                                                                                                                                                                                                                                                                                                                                                                                                                                                                                                                                                                                                                                                                                                                     |
|------|---------------------------------------------------------------------------------------------------------------------------------------------------------------------------------------------------------------------------------------------------------------------------------------------------------------------------------------------------------------------------------------------------------------------------------------------------------------------------------------------------------------------------------------------------------------------------------------------------------------------------------------------------------------------------------------------------------------------------------------------------------------------------------------------------------------------------------------------------------------------------------------------------------------|
| 0.00 | No HYP residues, only PRO residues present                                                                                                                                                                                                                                                                                                                                                                                                                                                                                                                                                                                                                                                                                                                                                                                                                                                                    |
| 0.14 | B8-C2-C5-C8-C23-C29<br>A2-B5-B29-C2-C8-C26<br>A5-A23-A26-B2-B5-C8<br>A2-A8-A29-B8-C2-C29<br>A2-A5-A23-B2-B5-B8<br>A8-B2-B5-B29-C2-C5<br>A2-A8-B23-C5-C23-C29<br>A2-A5-A8-A23-C26-C29<br>A26-A29-B2-B29-C2-C5<br>A2-A5-B2-B23-B29-C29                                                                                                                                                                                                                                                                                                                                                                                                                                                                                                                                                                                                                                                                          |
| 0.29 | A2-A5-A23-A29-B2-B5-B23-B26-C2-C8-C23-C29<br>A5-A8-A23-A26-A29-B5-B23-C2-C5-C8-C23-C29<br>A5-A23-A26-A29-B2-B23-B29-C2-C5-C23-C26-C29<br>A2-A8-A29-B2-B23-B26-B29-C5-C8-C23-C26-C29<br>A2-A5-A8-A23-A26-A29-B2-B8-B23-B26-B29-C26<br>A2-A5-A23-B5-B8-B23-B26-C5-C8-C23-C26-C29<br>A5-A8-A23-A26-A29-B2-B5-B8-B23-B26-B29-C8<br>A2-A5-A23-A26-A29-B8-B23-B26-B29-C8-C26-C29<br>A2-A5-A23-A26-A29-B2-B26-B29-C2-C5-C8-C29<br>A2-A5-A8-A23-A26-A29-B2-B5-B8-C2-C8-C23                                                                                                                                                                                                                                                                                                                                                                                                                                            |
| 0.43 | HYP-A2-A5-A8-A23-A26-A29-B2-B5-B8-B23-B26-B29-C2-C5-C8-C23-C26-C29<br>PRO-A1-A4-A7-A14-A19-A22-A25-A28-B1-B4-B7-B14-B19-B22-B25-B28-C1-C4-C7-C14                                                                                                                                                                                                                                                                                                                                                                                                                                                                                                                                                                                                                                                                                                                                                              |
| 0.57 | A2-A5-A7-A8-A23-A26-A29-B1-B2-B4-B5-B7-B8-B23-B26-B28-B29-C2-C5-C8-C14-C23-C26-C29<br>A2-A5-A8-A22-A23-A26-A29-B2-B4-B5-B8-B22-B23-B26-B28-B29-C2-C5-C8-C14-C23-C26-C28-C29<br>A2-A5-A8-A19-A22-A23-A26-A29-B1-B2-B5-B7-B8-B23-B26-B29-C2-C4-C5-C8-C22-C23-C26-C29<br>A2-A5-A8-A23-A26-A29-B2-B5-B8-B14-B19-B23-B25-B26-B29-C2-C5-C8-C14-C22-C23-C25-C26-C29<br>A2-A4-A5-A7-A8-A22-A23-A26-A29-B2-B5-B8-B23-B26-B29-C2-C5-C7-C8-C23-C25-C26-C28-C29<br>A2-A5-A7-A8-A19-A23-A25-A26-A28-A29-B2-B5-B7-B8-B23-B26-B29-C2-C5-C8-C19-C23-C26-C29<br>A2-A5-A7-A8-A14-A19-A23-A26-A29-B1-B2-B4-B5-B8-B23-B26-B28-B29-C2-C5-C8-C23-C26-C29<br>A1-A2-A5-A7-A8-A23-A25-A26-A29-B2-B5-B8-B23-B25-B26-B28-B29-C2-C5-C8-C14-C23-C26-C29<br>A2-A5-A8-A14-A19-A22-A23-A26-A29-B2-B5-B8-B22-B23-B26-B29-C2-C5-C8-C19-C23-C26-C28-C29<br>A2-A5-A8-A19-A23-A25-A26-A28-A29-B1-B2-B5-B8-B19-B22-B23-B26-B29-C2-C5-C8-C23-C26-C29 |

| HD   | Sequences                                                                                                                                                                                                                                                                                                                                                                                                                                                                                                                                                                                                                                                                                                                                                                                                                                                                                                                                                                                                                                                                                                                                                                                                                                                                                                                                                     |
|------|---------------------------------------------------------------------------------------------------------------------------------------------------------------------------------------------------------------------------------------------------------------------------------------------------------------------------------------------------------------------------------------------------------------------------------------------------------------------------------------------------------------------------------------------------------------------------------------------------------------------------------------------------------------------------------------------------------------------------------------------------------------------------------------------------------------------------------------------------------------------------------------------------------------------------------------------------------------------------------------------------------------------------------------------------------------------------------------------------------------------------------------------------------------------------------------------------------------------------------------------------------------------------------------------------------------------------------------------------------------|
| 0.71 | A1-A2-A4-A5-A8-A14-A22-A23-A26-A28-A29-B2-B4-B5-B7-B8-B22-B23-B26-B28-B29-C2-C4-C5-C8-C23-C25-C26-C28-C29<br>A2-A5-A7-A8-A14-A22-A23-A25-A26-A28-A29-B2-B5-B7-B8-B22-B23-B25-B26-B29-C1-C2-C5-C7-C8-C14-C22-C23-C26-C29<br>A1-A2-A4-A5-A8-A19-A22-A23-A26-A29-B2-B4-B5-B8-B14-B19-B23-B26-B29-C1-C2-C5-C7-C8-C19-C22-C23-C25-C26-C29<br>A2-A4-A5-A7-A8-A14-A22-A23-A25-A26-A28-A29-B1-B2-B5-B8-B22-B23-B26-B29-C1-C2-C4-C5-C8-C14-C23-C26-C28-C29<br>A1-A2-A5-A8-A14-A22-A23-A26-A29-B1-B2-B4-B5-B8-B14-B19-B23-B26-B28-B29-C2-C4-C5-C7-C8-C14-C22-C23-C26-C29<br>A1-A2-A4-A5-A8-A14-A19-A23-A25-A26-A29-B1-B2-B5-B8-B14-B22-B23-B25-B26-B29-C1-C2-C5-C8-C14-C23-C26-C28-C29<br>A2-A4-A5-A7-A8-A19-A22-A23-A26-A29-B1-B2-B5-B7-B8-B14-B19-B23-B25-B26-B28-B29-C1-C2-C5-C8-C22-C23-C26-C29<br>A2-A4-A5-A7-A8-A19-A22-A23-A26-A29-B1-B2-B4-B5-B8-B23-B25-B26-B29-C1-C2-C4-C5-C7-C8-C19-C22-C23-C26-C29<br>A2-A4-A5-A7-A8-A14-A22-A23-A25-A26-A28-A29-B2-B5-B7-B8-B14-B19-B23-B26-B29-C2-C5-C8-C19-C22-C23-C25-C26-C29<br>A1-A2-A5-A8-A14-A19-A22-A23-A25-A26-A29-B2-B5-B7-B8-B22-B23-B26-B29-C2-C5-C8-C14-C19-C22-C23-C25-C26-C28-C29                                                                                                                                                                                                                           |
| 0.86 | A1-A2-A4-A5-A8-A14-A22-A23-A26-A29-B2-B4-B5-B7-B8-B14-B19-B22-B23-B25-B26-B28-B29-C1-C2-C4-C5-C7-C8-C14-C19-C22-C23-C25-C26-C29<br>A1-A2-A4-A5-A7-A8-A14-A19-A22-A23-A26-A28-A29-B1-B2-B4-B5-B7-B8-B22-B23-B25-B26-B28-B29-C2-C4-C5-C7-C8-C19-C22-C23-C25-C26-C29<br>A1-A2-A5-A7-A8-A14-A19-A22-A23-A25-A26-A29-B1-B2-B4-B5-B7-B8-B14-B19-B23-B26-B28-B29-C2-C4-C5-C7-C8-C19-C22-C23-C25-C26-C28-C29<br>A1-A2-A4-A5-A7-A8-A14-A19-A22-A23-A25-A26-A28-A29-B2-B4-B5-B8-B14-B22-B23-B26-B28-B29-C1-C2-C5-C7-C8-C19-C22-C23-C25-C26-C28-C29<br>A2-A4-A5-A7-A8-A14-A22-A23-A25-A26-A28-A29-B1-B2-B5-B7-B8-B14-B23-B26-B28-B29-C1-C2-C4-C5-C7-C8-C14-C19-C22-C23-C25-C26-C28-C29<br>A2-A4-A5-A7-A8-A19-A23-A25-A26-A28-A29-B1-B2-B4-B5-B7-B8-B14-B19-B23-B25-B26-B28-B29-C1-C2-C4-C5-C7-C8-C14-C19-C23-C26-C28-C29<br>A1-A2-A5-A7-A8-A14-A19-A23-A25-A26-A29-B1-B2-B5-B7-B8-B14-B19-B23-B25-B26-B28-B29-C1-C2-C4-C5-C7-C8-C14-C19-C22-C23-C25-C26-C29<br>A2-A4-A5-A7-A8-A14-A19-A22-A23-A25-A26-A28-A29-B1-B2-B5-B8-B14-B19-B22-B23-B25-B26-B29-C1-C2-C4-C5-C8-C14-C22-C23-C25-C26-C28-C29<br>A2-A4-A5-A7-A8-A19-A22-A23-A25-A26-A28-A29-B1-B2-B4-B5-B8-B14-B19-B23-B25-B26-B28-B29-C2-C4-C5-C7-C8-C14-C22-C23-C25-C26-C28-C29<br>A1-A2-A4-A5-A8-A14-A22-A23-A25-A26-A28-A29-B1-B2-B5-B7-B8-B14-B19-B22-B23-B25-B26-B28-B29-C1-C2-C5-C7-C8-C19-C23-C25-C26-C28-C29 |
| 1.00 | No PRO residues, only HYP residues present                                                                                                                                                                                                                                                                                                                                                                                                                                                                                                                                                                                                                                                                                                                                                                                                                                                                                                                                                                                                                                                                                                                                                                                                                                                                                                                    |

#### Description for Tables S2-S13

ARG - NE, HH1 and NH2 guanidino group of the side chain, N - nitrogen of the amino group in the main chain, GLU - OE1 and OE2 oxygen atoms from the carboxyl group, N - nitrogen of the amino group in the main chain; HYP - O3 and O4 - oxygen from the side chain hydroxyl group in 3HYP and 4HYP variants respectively, N - nitrogen of the amino group in the main chain; PRO - N - nitrogen of the amino group in the main chain, O - oxygen in the main chain; GLY - N - nitrogen of the amino group in the main chain, O - oxygen in the main chain; ALA - N - nitrogen of the amino group in the main chain, O - oxygen in the main chain; GLN - OE1 - oxygen of the amino group in the side chain, NE2- nitrogen of the amino group in the side chain, N - nitrogen of the amino group in the main chain, O - oxygen in the main chain. The numbering of atoms in HA according to Fig. S1 (GCU - O5 and O6 oxygen from the carboxyl group, O2 and O3 oxygen from the hydroxyl group, O5 - oxygen in the ring; NAG - N - nitrogen at the acetyl group, O7 oxygen from the acetyl group, O5 oxygen in the ring, O4 and O6 hydroxyl groups).

**Table S2** Distribution of H-bonds between HA and collagen amino acid atoms for HD=0. Percentages represent a contributions of H-bonds identified between HA and a given amino acid residue. The numbering of atoms is presented in “Description for Tables S2-S13” section (atoms O3 and O7 in HA did not form any H-bonds with collagen).

|           | ARG | ARG | ARG | ARG | GLU | GLU | GLU | PRO | PRO | GLY | GLY | ALA | ALA | GLN | GLN | GLN | GLN |
|-----------|-----|-----|-----|-----|-----|-----|-----|-----|-----|-----|-----|-----|-----|-----|-----|-----|-----|
|           | N   | NH1 | NH2 | NE  | OE1 | OE2 | N   | N   | O   | N   | O   | N   | O   | OE1 | NE2 | O   | N   |
| <b>N</b>  | 0%  | 0%  | 0%  | 0%  | 2%  | 3%  | 0%  | 0%  | 7%  | 0%  | 7%  | 0%  | 0%  | 7%  | 0%  | 3%  | 0%  |
| <b>O1</b> | 3%  | 1%  | 1%  | 2%  | 10% | 5%  | 2%  | 0%  | 26% | 0%  | 34% | 7%  | 22% | 3%  | 7%  | 7%  | 0%  |

|            | ARG | ARG | ARG | ARG | GLU | GLU | GLU | PRO | PRO | GLY | GLY | ALA | ALA | GLN | GLN | GLN | GLN |
|------------|-----|-----|-----|-----|-----|-----|-----|-----|-----|-----|-----|-----|-----|-----|-----|-----|-----|
|            | N   | NH1 | NH2 | NE  | OE1 | OE2 | N   | N   | O   | N   | O   | N   | O   | OE1 | NE2 | O   | N   |
| <b>O2</b>  | 1%  | 3%  | 4%  | 0%  | 3%  | 7%  | 0%  | 0%  | 17% | 1%  | 18% | 2%  | 13% | 7%  | 3%  | 17% | 0%  |
| <b>O4</b>  | 0%  | 0%  | 1%  | 1%  | 0%  | 0%  | 0%  | 0%  | 0%  | 0%  | 0%  | 0%  | 0%  | 0%  | 0%  | 0%  | 0%  |
| <b>O5</b>  | 1%  | 5%  | 12% | 8%  | 0%  | 0%  | 5%  | 0%  | 0%  | 0%  | 0%  | 11% | 2%  | 0%  | 0%  | 0%  | 3%  |
| <b>O6</b>  | 2%  | 5%  | 8%  | 9%  | 0%  | 0%  | 3%  | 0%  | 0%  | 0%  | 0%  | 9%  | 0%  | 0%  | 0%  | 0%  | 0%  |
| <b>O8</b>  | 1%  | 2%  | 2%  | 1%  | 10% | 9%  | 0%  | 1%  | 19% | 0%  | 11% | 4%  | 9%  | 0%  | 0%  | 0%  | 0%  |
| <b>O9</b>  | 0%  | 1%  | 0%  | 0%  | 0%  | 0%  | 0%  | 0%  | 0%  | 0%  | 0%  | 0%  | 0%  | 0%  | 7%  | 3%  | 7%  |
| <b>O10</b> | 3%  | 3%  | 5%  | 1%  | 12% | 12% | 16% | 0%  | 26% | 0%  | 28% | 6%  | 7%  | 3%  | 7%  | 3%  | 0%  |
| <b>O11</b> | 1%  | 6%  | 3%  | 4%  | 0%  | 0%  | 0%  | 3%  | 0%  | 0%  | 0%  | 7%  | 0%  | 0%  | 3%  | 0%  | 7%  |

**Table S3** Distribution of H-bonds between HA and collagen amino acid atoms for HD=1 (3HYP). Percentages represent a contributions of H-bonds identified between HA and a given amino acid residue. The numbering of atoms is presented in “Description for Tables S2-S13” section on page 5 (atoms O3 and O7 in HA did not form any H-bonds with collagen).

|            | ARG | ARG | ARG | ARG | GLU | GLU | GLU | HYP | HYP  | HYP | GLY | GLY | ALA | ALA | GLN | GLN | GLN | GLN |
|------------|-----|-----|-----|-----|-----|-----|-----|-----|------|-----|-----|-----|-----|-----|-----|-----|-----|-----|
|            | N   | NH1 | NH2 | NE  | OE1 | OE2 | N   | O3  | O    | N   | N   | O   | N   | O   | OE1 | NE2 | O   | N   |
| <b>N</b>   | 0%  | 0%  | 0%  | 0%  | 0%  | 0%  | 0%  | 4%  | 2%   | 0%  | 0%  | 10% | 0%  | 0%  | 7%  | 0%  | 0%  | 0%  |
| <b>O1</b>  | 0%  | 2%  | 4%  | 2%  | 12% | 9%  | 21% | 14% | 10%  | 0%  | 0%  | 28% | 5%  | 14% | 7%  | 7%  | 13% | 0%  |
| <b>O2</b>  | 2%  | 2%  | 6%  | 4%  | 6%  | 6%  | 6%  | 12% | 4%   | 0%  | 0%  | 14% | 14% | 8%  | 7%  | 0%  | 0%  | 7%  |
| <b>O4</b>  | 0%  | 1%  | 0%  | 0%  | 0%  | 0%  | 0%  | 0%  | 0.5% | 0%  | 0%  | 0%  | 0%  | 0%  | 0%  | 0%  | 0%  | 0%  |
| <b>O5</b>  | 2%  | 3%  | 4%  | 6%  | 0%  | 0%  | 3%  | 10% | 0%   | 1%  | 0%  | 0%  | 19% | 0%  | 0%  | 0%  | 0%  | 7%  |
| <b>O6</b>  | 3%  | 5%  | 12% | 6%  | 0%  | 0%  | 0%  | 13% | 0%   | 0%  | 0%  | 0%  | 11% | 0%  | 0%  | 7%  | 0%  | 0%  |
| <b>O8</b>  | 0%  | 0%  | 5%  | 2%  | 9%  | 3%  | 3%  | 10% | 4%   | 0%  | 0%  | 12% | 3%  | 5%  | 0%  | 0%  | 0%  | 0%  |
| <b>O9</b>  | 0%  | 0%  | 1%  | 0%  | 0%  | 0%  | 0%  | 0%  | 0.5% | 0%  | 0%  | 0%  | 0%  | 0%  | 0%  | 0%  | 7%  | 0%  |
| <b>O10</b> | 5%  | 4%  | 5%  | 4%  | 3%  | 3%  | 15% | 7%  | 4%   | 0%  | 0%  | 36% | 5%  | 8%  | 0%  | 0%  | 13% | 7%  |
| <b>O11</b> | 2%  | 2%  | 2%  | 4%  | 0%  | 0%  | 3%  | 6%  | 0%   | 0%  | 0%  | 0%  | 8%  | 0%  | 0%  | 7%  | 0%  | 7%  |

**Table S4** Distribution of H-bonds between HA and collagen amino acid atoms for HD=1 (4HYP). Percentages represent a contributions of H-bonds identified between HA and a given amino acid residue. The numbering of atoms is presented in “Description for Tables S2-S13” section on page 5 (atoms O3 and O7 in HA did not form any H-bonds with collagen).

|           | ARG | ARG | ARG | ARG | GLU | GLU | GLU | HYP  | HYP | HYP | GLY | GLY | ALA | ALA | GLN | GLN | GLN | GLN |
|-----------|-----|-----|-----|-----|-----|-----|-----|------|-----|-----|-----|-----|-----|-----|-----|-----|-----|-----|
|           | N   | NH1 | NH2 | NE  | OE1 | OE2 | N   | O4   | O   | N   | N   | O   | N   | O   | OE1 | NE2 | O   | N   |
| <b>N</b>  | 0%  | 0%  | 0%  | 0%  | 5%  | 15% | 0%  | 4%   | 3%  | 0%  | 0%  | 9%  | 0%  | 2%  | 9%  | 0%  | 5%  | 0%  |
| <b>O1</b> | 3%  | 4%  | 2%  | 2%  | 0%  | 0%  | 10% | 8%   | 6%  | 0%  | 0%  | 35% | 3%  | 14% | 5%  | 14% | 0%  | 5%  |
| <b>O2</b> | 5%  | 4%  | 2%  | 1%  | 5%  | 0%  | 5%  | 10%  | 4%  | 0%  | 1%  | 13% | 12% | 10% | 14% | 5%  | 0%  | 9%  |
| <b>O4</b> | 0%  | 0%  | 1%  | 0%  | 0%  | 0%  | 0%  | 0.5% | 0%  | 0%  | 0%  | 0%  | 0%  | 0%  | 0%  | 0%  | 0%  | 0%  |

|            | ARG | ARG | ARG | ARG | GLU | GLU | GLU | HYP  | HYP | HYP | GLY | GLY | ALA | ALA | GLN | GLN | GLN | GLN |
|------------|-----|-----|-----|-----|-----|-----|-----|------|-----|-----|-----|-----|-----|-----|-----|-----|-----|-----|
|            | N   | NH1 | NH2 | NE  | OE1 | OE2 | N   | O4   | O   | N   | N   | O   | N   | O   | OE1 | NE2 | O   | N   |
| <b>O5</b>  | 1%  | 8%  | 10% | 9%  | 0%  | 0%  | 5%  | 17%  | 0%  | 0%  | 0%  | 0%  | 10% | 0%  | 0%  | 5%  | 0%  | 5%  |
| <b>O6</b>  | 3%  | 7%  | 8%  | 3%  | 0%  | 0%  | 0%  | 15%  | 0%  | 0%  | 0%  | 0%  | 5%  | 0%  | 0%  | 5%  | 0%  | 0%  |
| <b>O8</b>  | 0%  | 1%  | 0%  | 1%  | 10% | 10% | 0%  | 7%   | 4%  | 0%  | 0%  | 15% | 5%  | 3%  | 0%  | 0%  | 0%  | 0%  |
| <b>O9</b>  | 0%  | 1%  | 1%  | 0%  | 0%  | 0%  | 0%  | 0.5% | 0%  | 0%  | 0%  | 0%  | 0%  | 0%  | 5%  | 0%  | 9%  | 0%  |
| <b>O10</b> | 1%  | 8%  | 2%  | 1%  | 10% | 15% | 5%  | 12%  | 4%  | 0%  | 0%  | 27% | 12% | 12% | 0%  | 0%  | 9%  | 0%  |
| <b>O11</b> | 0%  | 5%  | 6%  | 2%  | 0%  | 0%  | 5%  | 5%   | 0%  | 0%  | 0%  | 0%  | 10% | 0%  | 0%  | 0%  | 0%  | 0%  |

**Table S5** H-bonds lengths [nm] between HA and collagen amino acid atoms for HD=0. The numbering of atoms is presented in “Description for Tables S2-S13” section on page 5 (atoms O3 and O7 in HA did not form any H-bonds with collagen). In the parentheses the standard deviation values were provided.

|            | ARG              | ARG              | ARG              | ARG              | GLU              | GLU              | GLU              | PRO              | PRO              | GLY              | GLY              | ALA              | ALA              | GLN              | GLN              | GLN              | GLN              |
|------------|------------------|------------------|------------------|------------------|------------------|------------------|------------------|------------------|------------------|------------------|------------------|------------------|------------------|------------------|------------------|------------------|------------------|
|            | N                | NH1              | NH2              | NE               | OE1              | OE2              | N                | N                | O                | N                | O                | N                | O                | OE1              | NE2              | O                | N                |
| <b>N</b>   | -                | -                | -                | -                | 0.177<br>(0.009) | 0.193<br>(0.011) | -                | -                | 0.213<br>(0.020) | -                | 0.198<br>(0.014) | -                | -                | 0.209<br>(0.015) | -                | 0.179<br>(0.012) | -                |
| <b>O1</b>  | 0.223<br>(0.015) | 0.215<br>(0.006) | 0.184<br>(0.008) | 0.201<br>(0.031) | 0.187<br>(0.031) | 0.170<br>(0.016) | 0.205<br>(0.010) | -                | 0.181<br>(0.018) | -                | 0.196<br>(0.020) | 0.209<br>(0.014) | 0.188<br>(0.015) | 0.161<br>(0.016) | 0.192<br>(0.020) | 0.212<br>(0.020) | -                |
| <b>O2</b>  | 0.206<br>(0.011) | 0.212<br>(0.020) | 0.183<br>(0.011) | -                | 0.169<br>(0.016) | 0.174<br>(0.014) | -                | -                | 0.190<br>(0.021) | 0.234<br>(0.006) | 0.192<br>(0.018) | 0.211<br>(0.018) | 0.189<br>(0.019) | 0.186<br>(0.013) | 0.226<br>(0.015) | 0.185<br>(0.017) | -                |
| <b>O4</b>  | -                | -                | 0.213<br>(0.009) | 0.234<br>(0.021) | -                | -                | -                | -                | -                | -                | -                | -                | -                | -                | -                | -                | -                |
| <b>O5</b>  | 0.182<br>(0.007) | 0.189<br>(0.015) | 0.191<br>(0.016) | 0.202<br>(0.013) | -                | -                | 0.213<br>(0.026) | -                | -                | -                | -                | 0.205<br>(0.019) | 0.190<br>(0.009) | -                | -                | -                | 0.192<br>(0.008) |
| <b>O6</b>  | 0.185<br>(0.013) | 0.187<br>(0.019) | 0.188<br>(0.011) | 0.192<br>(0.012) | -                | -                | 0.193<br>(0.002) | -                | -                | -                | -                | 0.195<br>(0.008) | -                | -                | -                | -                | -                |
| <b>O8</b>  | 0.204<br>(0.008) | 0.206<br>(0.013) | 0.199<br>(0.008) | 0.190<br>(0.017) | 0.177<br>(0.010) | 0.182<br>(0.015) | -                | 0.204<br>(0.019) | 0.179<br>(0.020) | -                | 0.189<br>(0.016) | 0.209<br>(0.018) | 0.186<br>(0.016) | -                | 0.210<br>(0.026) | 0.169<br>(0.014) | 0.225<br>(0.022) |
| <b>O9</b>  | -                | 0.229<br>(0.014) | -                | -                | -                | -                | -                | -                | -                | -                | -                | -                | -                | -                | -                | -                | -                |
| <b>O10</b> | 0.203<br>(0.009) | 0.206<br>(0.020) | 0.198<br>(0.011) | 0.222<br>(0.020) | 0.177<br>(0.012) | 0.170<br>(0.017) | 0.198<br>(0.014) | -                | 0.186<br>(0.015) | -                | 0.187<br>(0.017) | 0.220<br>(0.007) | 0.190<br>(0.014) | 0.183<br>(0.006) | 0.181<br>(0.008) | 0.181<br>(0.010) | -                |
| <b>O11</b> | 0.184<br>(0.009) | 0.201<br>(0.025) | 0.210<br>(0.017) | 0.193<br>(0.012) | -                | -                | -                | 0.210<br>(0.039) | -                | -                | -                | 0.207<br>(0.016) | -                | -                | 0.212<br>(0.009) | -                | 0.213<br>(0.014) |

**Table S6** H-bonds lengths [nm] between HA and collagen amino acid atoms for HD=1 (3HYP). The numbering of atoms is presented in “Description for Tables S2-S13” section on page 5 (atoms O3 and O7 in HA did not form any H-bonds with collagen). In the parentheses the standard deviation values were provided.

|     | ARG              | ARG              | ARG              | ARG              | GLU              | GLU              | GLU              | HYP              | HYP              | HYP              | GLY | GLY              | ALA              | ALA              | GLN              | GLN              | GLN              | GLN              |
|-----|------------------|------------------|------------------|------------------|------------------|------------------|------------------|------------------|------------------|------------------|-----|------------------|------------------|------------------|------------------|------------------|------------------|------------------|
|     | N                | NH1              | NH2              | NE               | OE1              | OE2              | N                | O3               | O                | N                | N   | O                | N                | O                | OE1              | NE2              | O                | N                |
| N   | -                | -                | -                | -                | -                | -                | -                | 0.202<br>(0.015) | 0.222<br>(0.014) | -                | -   | 0.200<br>(0.021) | -                | -                | 0.240<br>(0.010) | -                | -                | -                |
| O1  | -                | 0.198<br>(0.003) | 0.200<br>(0.016) | 0.200<br>(0.014) | 0.183<br>(0.028) | 0.162<br>(0.010) | 0.221<br>(0.016) | 0.187<br>(0.018) | 0.193<br>(0.021) | -                | -   | 0.194<br>(0.016) | 0.206<br>(0.005) | 0.186<br>(0.018) | 0.175<br>(0.011) | 0.226<br>(0.008) | 0.181<br>(0.007) | -                |
| O2  | 0.216<br>(0.015) | 0.204<br>(0.001) | 0.198<br>(0.013) | 0.208<br>(0.014) | 0.194<br>(0.026) | 0.171<br>(0.002) | 0.228<br>(0.014) | 0.189<br>(0.017) | 0.189<br>(0.022) | -                | -   | 0.196<br>(0.019) | 0.222<br>(0.016) | 0.191<br>(0.005) | 0.226<br>(0.021) | -                | -                | 0.223<br>(0.021) |
| O4  | -                | 0.199<br>(0.005) | -                | -                | -                | -                | -                | 0.187<br>(0.014) | -                | -                | -   | -                | -                | -                | -                | -                | -                | -                |
| O5  | 0.198<br>(0.009) | 0.204<br>(0.011) | 0.185<br>(0.007) | 0.205<br>(0.022) | -                | -                | 0.193<br>(0.009) | 0.179<br>(0.015) | -                | 0.182<br>(0.023) | -   | -                | 0.208<br>(0.016) | -                | -                | -                | -                | 0.182<br>(0.012) |
| O6  | 0.196<br>(0.013) | 0.188<br>(0.014) | 0.189<br>(0.020) | 0.192<br>(0.011) | -                | -                | -                | 0.171<br>(0.015) | -                | -                | -   | -                | 0.199<br>(0.016) | -                | -                | 0.199<br>(0.011) | -                | -                |
| O8  | -                | -                | 0.207<br>(0.018) | 0.209<br>(0.024) | 0.172<br>(0.015) | 0.158<br>(0.019) | 0.235<br>(0.016) | 0.189<br>(0.017) | 0.189<br>(0.017) | -                | -   | 0.188<br>(0.021) | 0.230<br>(0.018) | 0.161<br>(0.006) | -                | -                | 0.211<br>(0.015) | -                |
| O9  | -                | -                | 0.201<br>(0.003) | -                | -                | -                | -                | 0.191<br>(0.015) | -                | -                | -   | -                | -                | -                | -                | -                | -                | -                |
| O10 | 0.210<br>(0.021) | 0.202<br>(0.026) | 0.200<br>(0.014) | 0.192<br>(0.010) | 0.177<br>(0.011) | 0.161<br>(0.020) | 0.202<br>(0.011) | 0.182<br>(0.013) | 0.195<br>(0.022) | -                | -   | 0.180<br>(0.016) | 0.210<br>(0.021) | 0.181<br>(0.014) | -                | -                | 0.184<br>(0.013) | 0.189<br>(0.007) |
| O11 | 0.228<br>(0.021) | 0.218<br>(0.012) | 0.192<br>(0.012) | 0.199<br>(0.018) | -                | -                | 0.214<br>(0.021) | 0.183<br>(0.016) | -                | -                | -   | -                | 0.183<br>(0.007) | -                | -                | 0.176<br>(0.006) | -                | 0.209<br>(0.004) |

**Table S7** H-bonds lengths [nm] between HA and collagen amino acid atoms for HD=1 (4HYP). The numbering of atoms is presented in “Description for Tables S2-S13” section on page 5 (atoms O3 and O7 in HA did not form any H-bonds with collagen). In the parentheses the standard deviation values were provided.

|    | ARG              | ARG              | ARG              | ARG              | GLU              | GLU              | GLU              | HYP              | HYP              | HYP              | GLY              | GLY              | ALA              | ALA              | GLN              | GLN              | GLN              | GLN              |
|----|------------------|------------------|------------------|------------------|------------------|------------------|------------------|------------------|------------------|------------------|------------------|------------------|------------------|------------------|------------------|------------------|------------------|------------------|
|    | N                | NH1              | NH2              | NE               | OE1              | OE2              | N                | O4               | O                | N                | N                | O                | N                | O                | OE1              | NE2              | O                | N                |
| N  | -                | -                | -                | -                | 0.204<br>(0.012) | 0.195<br>(0.014) | -                | 0.213<br>(0.013) | 0.210<br>(0.018) | -                | -                | 0.212<br>(0.016) | -                | 0.192<br>(0.023) | 0.221<br>(0.011) | -                | 0.241<br>(0.004) | -                |
| O1 | 0.212<br>(0.016) | 0.210<br>(0.023) | 0.208<br>(0.021) | 0.203<br>(0.014) | -                | -                | 0.223<br>(0.003) | 0.188<br>(0.015) | 0.188<br>(0.021) | 0.195<br>(0.022) | -                | 0.192<br>(0.020) | 0.216<br>(0.008) | 0.181<br>(0.019) | 0.158<br>(0.018) | 0.197<br>(0.003) | -                | 0.194<br>(0.004) |
| O2 | 0.224<br>(0.013) | 0.218<br>(0.010) | 0.224<br>(0.004) | 0.215<br>(0.015) | 0.157<br>(0.011) | -                | 0.190<br>(0.010) | 0.192<br>(0.019) | 0.185<br>(0.019) | 0.177<br>(0.014) | 0.214<br>(0.015) | 0.194<br>(0.013) | 0.212<br>(0.017) | 0.181<br>(0.019) | 0.172<br>(0.007) | 0.234<br>(0.006) | -                | 0.198<br>(0.001) |
| O4 | -                | -                | 0.207<br>(0.003) | -                | -                | -                | -                | 0.220<br>(0.023) | -                | -                | -                | -                | -                | -                | -                | -                | -                | -                |



|            | ARG              | ARG              | ARG              | ARG              | GLU              | GLU              | GLU              | HYP              | HYP              | HYP              | GLY | GLY              | ALA              | ALA              | GLN              | GLN              | GLN              | GLN              |
|------------|------------------|------------------|------------------|------------------|------------------|------------------|------------------|------------------|------------------|------------------|-----|------------------|------------------|------------------|------------------|------------------|------------------|------------------|
|            | N                | NH1              | NH2              | NE               | OE1              | OE2              | N                | O4               | O                | N                | N   | O                | N                | O                | OE1              | NE2              | O                | N                |
| <b>O5</b>  | 0.201<br>(0.011) | 0.195<br>(0.013) | 0.186<br>(0.011) | 0.190<br>(0.015) | -                | -                | 0.216<br>(0.012) | 0.170<br>(0.014) | -                | -                | -   | -                | 0.197<br>(0.013) | -                | -                | 0.186<br>(0.011) | -                | 0.191<br>(0.012) |
| <b>O6</b>  | 0.207<br>(0.017) | 0.195<br>(0.013) | 0.193<br>(0.020) | 0.198<br>(0.026) | -                | -                | -                | 0.171<br>(0.015) | -                | 0.203<br>(0.027) | -   | -                | 0.204<br>(0.014) | -                | -                | 0.181<br>(0.008) | -                | -                |
| <b>O8</b>  | -                | 0.188<br>(0.011) | -                | 0.233<br>(0.022) | 0.172<br>(0.004) | 0.181<br>(0.006) | -                | 0.192<br>(0.016) | 0.187<br>(0.015) | -                | -   | 0.178<br>(0.015) | 0.205<br>(0.025) | 0.185<br>(0.013) | 0.177<br>(0.015) | -                | 0.199<br>(0.004) | -                |
| <b>O9</b>  | -                | 0.227<br>(0.015) | 0.195<br>(0.018) | -                | -                | -                | -                | 0.211<br>(0.014) | -                | -                | -   | -                | -                | -                | -                | -                | -                | -                |
| <b>O10</b> | 0.208<br>(0.009) | 0.195<br>(0.008) | 0.189<br>(0.01)  | 0.179<br>(0.009) | 0.165<br>(0.004) | 0.175<br>(0.016) | 0.188<br>(0.012) | 0.188<br>(0.016) | 0.183<br>(0.016) | -                | -   | 0.190<br>(0.019) | 0.214<br>(0.012) | 0.182<br>(0.020) | -                | -                | 0.171<br>(0.001) | -                |
| <b>O11</b> | -                | 0.188<br>(0.014) | 0.202<br>(0.012) | 0.204<br>(0.006) | -                | -                | 0.230<br>(0.013) | 0.182<br>(0.018) | -                | -                | -   | -                | 0.205<br>(0.013) | -                | -                | -                | -                | -                |

**Table S8** Energies of H-bonds [kJ/mol] between HA and given collagen amino acid residue atom for HD=0. The numbering of atoms is presented in “Description for Tables S2-S13” section on page 5 (atoms O3 and O7 in HA did not form any H-bonds with collagen). In the parentheses the standard deviation values were provided.

|            | ARG            | ARG            | ARG            | ARG            | GLU            | GLU            | GLU            | PRO           | PRO            | GLY           | GLY            | ALA            | ALA            | GLN            | GLN            | GLN            | GLN            |
|------------|----------------|----------------|----------------|----------------|----------------|----------------|----------------|---------------|----------------|---------------|----------------|----------------|----------------|----------------|----------------|----------------|----------------|
|            | N              | NH1            | NH2            | NE             | OE1            | OE2            | N              | N             | O              | N             | O              | N              | O              | OE1            | NE2            | O              | N              |
| <b>N</b>   | -              | -              | -              | -              | -25.0<br>(0.0) | -23.0<br>(2.1) | -              | -             | -17.7<br>(5.4) | -             | -19.1<br>(5.0) | -              | -              | -16.2<br>(5.3) | -              | -21.5<br>(3.7) | -              |
| <b>O1</b>  | -16.8<br>(6.4) | -15.1<br>(8.0) | -16.3<br>(0.9) | -17.5<br>(8.0) | -18.7<br>(6.4) | -23.2<br>(3.1) | -25.0<br>(0.0) | -             | -21.4<br>(5.0) | -             | -19.3<br>(5.4) | -17.6<br>(3.1) | -21.8<br>(4.2) | -22.9<br>(4.9) | -25.0<br>(0.0) | -13.0<br>(5.6) | -              |
| <b>O2</b>  | -11.3<br>(1.6) | -14.3<br>(7.4) | -21.5<br>(3.4) | -              | -25.0<br>(0.8) | -24.6<br>(0.8) | -              | -             | -21.2<br>(5.9) | -6.6<br>(1.1) | -19.9<br>(4.3) | -15.4<br>(2.5) | -19.0<br>(6.6) | -17.0<br>(5.3) | -17.2<br>(3.1) | -24.5<br>(0.7) | -              |
| <b>O4</b>  | -              | -              | -17.6<br>(2.4) | -8.0<br>(0.4)  | -              | -              | -              | -             | -              | -             | -              | -              | -              | -              | -              | -              | -              |
| <b>O5</b>  | -21.6<br>(4.8) | -19.7<br>(4.0) | -19.2<br>(5.1) | -17.4<br>(3.2) | -              | -              | -15.2<br>(8.7) | -             | -              | -             | -              | -15.6<br>(5.8) | -25.0<br>(0.9) | -              | -              | -              | -24.4<br>(0.6) |
| <b>O6</b>  | -21.7<br>(5.7) | -21.7<br>(4.4) | -19.1<br>(4.3) | -18.9<br>(3.0) | -              | -              | -16.3<br>(5.1) | -             | -              | -             | -              | -23.1<br>(2.6) | -              | -              | -              | -              | -              |
| <b>O8</b>  | -21.6<br>(4.8) | -16.4<br>(6.2) | -18.5<br>(2.0) | -21.9<br>(5.3) | -23.4<br>(2.0) | -21.3<br>(3.0) | -              | -9.0<br>(2.5) | -22.7<br>(4.8) | -             | -22.0<br>(2.4) | -15.7<br>(0.4) | -21.4<br>(3.3) | -              | -14.4<br>(2.0) | -25.0<br>(0.0) | -14.5<br>(6.5) |
| <b>O9</b>  | -              | -6.4<br>(0.8)  | -              | -              | -              | -              | -              | -             | -              | -             | -              | -              | -              | -              | -              | -              | -              |
| <b>O10</b> | -21.3<br>(2.6) | -16.6<br>(6.4) | -20.1<br>(3.6) | -12.7<br>(1.9) | -22.9<br>(3.3) | -23.8<br>(2.7) | -22.2<br>(4.0) | -             | -22.2<br>(3.6) | -             | -21.6<br>(4.3) | -16.4<br>(3.8) | -20.2<br>(3.6) | -17.0<br>(3.8) | -23.1<br>(1.1) | -25.0<br>(0.0) | -              |

|            | ARG            | ARG            | ARG            | ARG            | GLU | GLU | GLU | PRO            | PRO | GLY | GLY | ALA            | ALA | GLN | GLN            | GLN | GLN            |
|------------|----------------|----------------|----------------|----------------|-----|-----|-----|----------------|-----|-----|-----|----------------|-----|-----|----------------|-----|----------------|
|            | N              | NH1            | NH2            | NE             | OE1 | OE2 | N   | N              | O   | N   | O   | N              | O   | OE1 | NE2            | O   | N              |
| <b>O11</b> | -22.0<br>(1.3) | -18.1<br>(7.0) | -14.8<br>(5.5) | -18.2<br>(2.7) | -   | -   | -   | -12.6<br>(4.6) | -   | -   | -   | -19.2<br>(2.9) | -   | -   | -16.4<br>(1.8) | -   | -19.5<br>(7.8) |

**Table S9** Energies of H-bonds [kJ/mol] between HA and given collagen amino acid residue atom for HD=1 (3HYP). The numbering of atoms is presented in “Description for Tables S2-S13” section on page 5 (atoms O3 and O7 in HA did not form any H-bonds with collagen). In the parentheses the standard deviation values were provided.

|            | ARG            | ARG            | ARG            | ARG            | GLU            | GLU            | GLU            | HYP            | HYP            | HYP            | GLY | GLY            | ALA            | ALA            | GLN            | GLN            | GLN            | GLN            |
|------------|----------------|----------------|----------------|----------------|----------------|----------------|----------------|----------------|----------------|----------------|-----|----------------|----------------|----------------|----------------|----------------|----------------|----------------|
|            | N              | NH1            | NH2            | NE             | OE1            | OE2            | N              | O3             | O              | N              | N   | O              | N              | O              | OE1            | NE2            | O              | N              |
| <b>N</b>   | -              | -              | -              | -              | -              | -              | -              | -17.8<br>(6.5) | -14.2<br>(7.7) | -              | -   | -18.3<br>(6.3) | -              | -              | -9.8<br>(1.5)  | -              | -              | -              |
| <b>O1</b>  | -              | -20.7<br>(6.1) | -18.9<br>(4.1) | -20.3<br>(4.9) | -21.1<br>(7.3) | -24.8<br>(0.3) | -13.5<br>(5.3) | -21.6<br>(4.8) | -19.6<br>(4.8) | -              | -   | -20.9<br>(4.7) | -23.3<br>(2.5) | -18.6<br>(5.3) | -24.4<br>(0.6) | -15.1<br>(4.2) | -25.0<br>(0.0) | -              |
| <b>O2</b>  | -17.1<br>(6.5) | -19.2<br>(1.0) | -18.5<br>(4.2) | -15.5<br>(5.1) | -14.6<br>(5.7) | -24.7<br>(0.4) | -14.2<br>(5.9) | -20.9<br>(4.2) | -20.4<br>(5.1) | -              | -   | -20.9<br>(4.8) | -14.1<br>(6.6) | -17.2<br>(3.4) | -16.5<br>(1.9) | -              | -              | -18.6<br>(1.7) |
| <b>O4</b>  | -              | -17.2<br>(2.9) | -              | -              | -              | -              | -              | -21.1<br>(3.0) | -              | -              | -   | -              | -              | -              | -              | -              | -              | -              |
| <b>O5</b>  | -19.7<br>(7.4) | -19.9<br>(4.4) | -21.3<br>(2.1) | -18.3<br>(5.9) | -              | -              | -21.9<br>(2.4) | -22.3<br>(2.9) | -              | -22.7<br>(3.3) | -   | -              | -19.6<br>(5.3) | -              | -              | -              | -              | -25.0<br>(0.0) |
| <b>O6</b>  | -23.5<br>(1.7) | -19.6<br>(5.4) | -18.7<br>(5.5) | -20.7<br>(5.7) | -              | -              | -              | -23.4<br>(2.4) | -              | -              | -   | -              | -20.2<br>(3.3) | -              | -              | -25.0<br>(0.0) | -              | -              |
| <b>O8</b>  | -              | -              | -17.0<br>(6.4) | -18.2<br>(6.3) | -21.2<br>(6.0) | -25.0<br>(0.0) | -12.3<br>(1.9) | -20.6<br>(4.8) | -19.9<br>(4.5) | -              | -   | -21.7<br>(5.5) | -8.9<br>(1.3)  | -23.9<br>(1.5) | -              | -              | -21.5<br>(4.9) | -              |
| <b>O9</b>  | -              | -              | -16.0<br>(1.6) | -              | -              | -              | -              | -25.0<br>(0.0) | -              | -              | -   | -              | -              | -              | -              | -              | -              | -              |
| <b>O10</b> | -17.4<br>(5.8) | -17.7<br>(5.6) | -18.4<br>(6.1) | -19.4<br>(5.2) | -22.9<br>(2.4) | -25.0<br>(0.0) | -19.8<br>(6.6) | -22.1<br>(3.9) | -20.1<br>(6.3) | -              | -   | -22.4<br>(3.6) | -15.5<br>(8.5) | -21.4<br>(5.0) | -              | -              | -21.3<br>(5.2) | -22.3<br>(2.1) |
| <b>O11</b> | -13.9<br>(9.3) | -19.1<br>(2.8) | -18.6<br>(4.7) | -17.1<br>(4.2) | -              | -              | -22.9<br>(3.9) | -21.8<br>(2.7) | -              | -              | -   | -              | -19.4<br>(4.9) | -              | -              | -25.0<br>(0.0) | -              | -23.5<br>(1.5) |

**Table S10** Energies of H-bonds [kJ/mol] between HA and given collagen amino acid residue atom for HD=1 (4HYP). The numbering of atoms is presented in “Description for Tables S2-S13” section on page 5 (atoms O3 and O7 in HA did not form any H-bonds with collagen). In the parentheses the standard deviation values were provided.

|           | ARG            | ARG            | ARG            | ARG            | GLU            | GLU            | GLU            | HYP            | HYP            | HYP            | GLY | GLY            | ALA            | ALA            | GLN            | GLN            | GLN           | GLN            |
|-----------|----------------|----------------|----------------|----------------|----------------|----------------|----------------|----------------|----------------|----------------|-----|----------------|----------------|----------------|----------------|----------------|---------------|----------------|
|           | N              | NH1            | NH2            | NE             | OE1            | OE2            | N              | O4             | O              | N              | N   | O              | N              | O              | OE1            | NE2            | O             | N              |
| <b>N</b>  | -              | -              | -              | -              | -19.6<br>(1.5) | -21.8<br>(3.0) | -              | -16.5<br>(3.2) | -18.1<br>(5.6) | -              | -   | -18.8<br>(4.2) | -              | -21.5<br>(1.0) | -11.3<br>(6.2) | -              | -7.5<br>(0.5) | -              |
| <b>O1</b> | -16.2<br>(8.4) | -18.2<br>(7.5) | -10.3<br>(4.8) | -13.7<br>(6.9) | -              | -              | -14.2<br>(0.7) | -21.0<br>(4.0) | -20.8<br>(5.4) | -25.0<br>(1.7) | -   | -20.7<br>(5.2) | -14.5<br>(0.0) | -22.7<br>(4.0) | -25.0<br>(0.0) | -21.4<br>(4.5) | -             | -21.9<br>(1.0) |

|            | ARG            | ARG            | ARG            | ARG            | GLU            | GLU            | GLU            | HYP            | HYP            | HYP            | GLY            | GLY            | ALA            | ALA            | GLN            | GLN            | GLN            | GLN            |
|------------|----------------|----------------|----------------|----------------|----------------|----------------|----------------|----------------|----------------|----------------|----------------|----------------|----------------|----------------|----------------|----------------|----------------|----------------|
|            | N              | NH1            | NH2            | NE             | OE1            | OE2            | N              | O4             | O              | N              | N              | O              | N              | O              | OE1            | NE2            | O              | N              |
| <b>O2</b>  | -13.3<br>(4.6) | -17.4<br>(5.3) | -11.5<br>(3.2) | -22.6<br>(2.9) | -25.0<br>(0.0) | -              | -25.0<br>(0.0) | -19.6<br>(5.6) | -20.4<br>(4.1) | -21.5<br>(1.0) | -17.6<br>(4.2) | -21.4<br>(4.6) | -18.6<br>(6.7) | -23.5<br>(1.9) | -24.5<br>(0.9) | -8.6<br>(0.8)  | -              | -20.0<br>(4.0) |
| <b>O4</b>  | -              | -              | -15.1<br>(1.2) | -              | -              | -              | -              | -10.0<br>(3.2) | -              | -              | -              | -              | -              | -              | -              | -              | -              | -              |
| <b>O5</b>  | -21.5<br>(2.3) | -19.0<br>(3.4) | -19.7<br>(3.2) | -19.7<br>(3.5) | -              | -              | -15.8<br>(0.0) | -24.0<br>(2.3) | -              | -              | -              | -              | -22.1<br>(2.5) | -              | -              | -25.0<br>(0.0) | -              | -25.0<br>(0.0) |
| <b>O6</b>  | -16.0<br>(7.0) | -20.2<br>(5.4) | -17.4<br>(6.2) | -13.9<br>(4.5) | -              | -              | -              | -23.8<br>(2.6) | -              | -14.5<br>(3.8) | -              | -              | -20.8<br>(0.6) | -              | -              | -25.0<br>(0.0) | -              | -              |
| <b>O8</b>  | -              | -19.6<br>(4.7) | -              | -8.1<br>(1.2)  | -25.0<br>(0.0) | -21.0<br>(3.5) | -              | -21.2<br>(4.1) | -20.6<br>(3.4) | -              | -              | -22.2<br>(4.3) | -20.3<br>(1.9) | -25.0<br>(0.0) | -25.0<br>(0.0) | -              | -18.5<br>(2.1) | -              |
| <b>O9</b>  | -              | -14.2<br>(3.4) | -7.7<br>(0.6)  | -              | -              | -              | -              | -12.2<br>(2.9) | -              | -              | -              | -              | -              | -              | -              | -              | -              | -              |
| <b>O10</b> | -19.9<br>(2.6) | -19.7<br>(4.3) | -18.2<br>(5.8) | -25.0<br>(0.0) | -22.5<br>(3.6) | -22.8<br>(2.0) | -25.0<br>(0.0) | -21.5<br>(3.4) | -20.9<br>(4.2) | -              | -              | -21.4<br>(3.5) | -18.4<br>(5.0) | -21.4<br>(6.3) | -              | -              | -24.7<br>(0.4) | -              |
| <b>O11</b> | -              | -20.3<br>(4.4) | -16.7<br>(4.4) | -15.6<br>(0.0) | -              | -              | -15.0<br>(0.0) | -23.1<br>(2.3) | -              | -              | -              | -              | -17.5<br>(8.1) | -              | -              | -              | -              | -              |

**Table S11** The H-bonds acceptor-donor frequency analysis. Values in cells represent how often HA in a given interaction plays the role of acceptor for HD=0. The numbering of atoms is presented in “Description for Tables S2-S13” section on page 5.

|            | ARG  | ARG  | ARG  | ARG  | GLU | GLU | GLU  | PRO  | PRO | GLY  | GLY | ALA  | ALA | GLN | GLN  | GLN | GLN  |
|------------|------|------|------|------|-----|-----|------|------|-----|------|-----|------|-----|-----|------|-----|------|
|            | N    | NH1  | NH2  | NE   | OE1 | OE2 | N    | N    | O   | N    | O   | N    | O   | OE1 | NE2  | O   | N    |
| <b>N</b>   | -    | -    | -    | -    | 0%  | 0%  | -    | -    | 0%  | -    | 0%  | -    | -   | 0%  | -    | 0%  | -    |
| <b>O1</b>  | 100% | 100% | 100% | 100% | 0%  | 0%  | 100% | -    | 0%  | -    | 0%  | 100% | 0%  | 0%  | 100% | 0%  | -    |
| <b>O2</b>  | 100% | 100% | 100% | -    | 0%  | 0%  | -    | -    | 0%  | 100% | 0%  | 100% | 0%  | 0%  | 100% | 0%  | -    |
| <b>O4</b>  | -    | -    | 100% | 100% | -   | -   | -    | -    | -   | -    | -   | -    | -   | -   | -    | -   | -    |
| <b>O5</b>  | -    | 100% | 100% | 100% | -   | -   | 100% | -    | -   | -    | -   | 100% | 0%  | -   | -    | -   | 100% |
| <b>O6</b>  | 100% | 100% | 100% | 100% | -   | -   | 100% | -    | -   | -    | -   | 100% | -   | -   | -    | -   | -    |
| <b>O8</b>  | 100% | 100% | 100% | 100% | 0%  | 0%  | -    | 100% | 0%  | -    | 0%  | 100% | 0%  | -   | 100% | 0%  | 100% |
| <b>O9</b>  | -    | 100% | -    | -    | -   | -   | -    | -    | -   | -    | -   | -    | -   | -   | -    | -   | -    |
| <b>O10</b> | 100% | 100% | 100% | 100% | 0%  | 0%  | 100% | -    | 0%  | -    | 0%  | 100% | 0%  | 0%  | 100% | 0%  | -    |
| <b>O11</b> | 100% | 100% | 100% | 100% | -   | -   | -    | 100% | -   | -    | -   | 100% | -   | -   | 100% | -   | 100% |

**Table S12** The H-bonds acceptor-donor frequency analysis. Values in cells represent how often HA in a given interaction plays the role of acceptor for HD=1 (3HYP). The numbering of atoms is presented in “Description for Tables S2-S13” section on page 5.

|            | ARG  | ARG  | ARG  | ARG  | GLU | GLU | GLU  | HYP  | HYP | HYP  | GLY | GLY | ALA  | ALA | GLN | GLN  | GLN | GLN  |
|------------|------|------|------|------|-----|-----|------|------|-----|------|-----|-----|------|-----|-----|------|-----|------|
|            | N    | NH1  | NH2  | NE   | OE1 | OE2 | N    | O3   | O   | N    | N   | O   | N    | O   | OE1 | NE2  | O   | N    |
| <b>N</b>   | -    | -    | -    | -    | -   | -   | -    | 0%   | 0%  | -    | -   | 0%  | -    | -   | 0%  | -    | -   | -    |
| <b>O1</b>  | -    | 100% | 100% | 100% | 0%  | 0%  | 100% | 49%  | 0%  | -    | -   | 0%  | 100% | 0%  | 0%  | 100% | 0%  | -    |
| <b>O2</b>  | 100% | 100% | 100% | 100% | 0%  | 0%  | 100% | 54%  | 0%  | -    | -   | 0%  | 100% | 0%  | 0%  | -    | -   | 100% |
| <b>O4</b>  | -    | 100% | -    | -    | -   | -   | -    | 100% | -   | -    | -   | -   | -    | -   | -   | -    | -   | -    |
| <b>O5</b>  |      | 100% | 100% | 100% | -   | -   | 100% | 100% | -   | 100% | -   | -   | 100% | -   | -   | -    | -   | 100% |
| <b>O6</b>  | 100% | 100% | 100% | 100% | -   | -   | -    | 100% | -   | -    | -   | -   | 100% | -   | -   | 100% | -   | -    |
| <b>O8</b>  | -    | -    | 100% | 100% | 0%  | 0%  | 100% | 52%  | 0%  | -    | -   | 0%  | 100% | 0%  | -   | -    | 0%  | -    |
| <b>O9</b>  | -    | -    | 100% | -    | -   | -   | -    | 100% | -   | -    | -   | -   | -    | -   | -   | -    | -   | -    |
| <b>O10</b> | 100% | 100% | 100% | 100% | 0%  | 0%  | 100% | 50%  | 0%  | -    | -   | 0%  | 100% | 0%  | -   | -    | 0%  | 100% |
| <b>O11</b> | 100% | 100% | 100% | 100% | -   | -   | 100% | 100% | -   | -    | -   | -   | 100% | -   | -   | 100% | -   | 100% |

**Table S13** The H-bonds acceptor-donor frequency analysis. Values in cells represent how often HA in a given interaction plays the role of acceptor for HD=1 (4HYP). The numbering of atoms is presented in “Description for Tables S2-S13” section on page 5.

|            | ARG  | ARG  | ARG  | ARG  | GLU | GLU | GLU  | HYP  | HYP | HYP  | GLY  | GLY | ALA  | ALA | GLN | GLN  | GLN | GLN  |
|------------|------|------|------|------|-----|-----|------|------|-----|------|------|-----|------|-----|-----|------|-----|------|
|            | N    | NH1  | NH2  | NE   | OE1 | OE2 | N    | O4   | O   | N    | N    | O   | N    | O   | OE1 | NE2  | O   | N    |
| <b>N</b>   | -    | -    | -    | -    | 0%  | 0%  | -    | 0%   | 0%  | -    | -    | 0%  | -    | 0%  | 0%  | -    | 0%  | -    |
| <b>O1</b>  | 100% | 100% | 100% | 100% | -   | -   | 100% | 63%  | 0%  | 100% | -    | 0%  | 100% | 0%  | 0%  | 100% | -   | 100% |
| <b>O2</b>  | 100% | 100% | 100% | 100% | 0%  | -   | 100% | 57%  | 0%  | 100% | 100% | 0%  | 100% | 0%  | 0%  | 100% | -   | 100% |
| <b>O4</b>  | -    | -    | 100% | -    | -   | -   | -    | 100% | -   | -    | -    | -   | -    | -   | -   | -    | -   | -    |
| <b>O5</b>  |      | 100% | 100% | 100% | -   | -   | 100% | 100% | -   | -    | -    | -   | 100% | -   | -   | 100% | -   | 100% |
| <b>O6</b>  | 100% | 100% | 100% | 100% | -   | -   | -    | 100% | -   | 100% | -    | -   | 100% | -   | -   | 100% | -   | -    |
| <b>O8</b>  | -    | 100% | -    | 100% | 0%  | 0%  | -    | 37%  | 0%  | -    | -    | 0%  | 100% | 0%  | 0%  | -    | 0%  | -    |
| <b>O9</b>  | -    | 100% | 100% | -    | -   | -   | -    | 100% | -   | -    | -    | -   | -    | -   | -   | -    | -   | -    |
| <b>O10</b> | 100% | 100% | 100% | 100% | 0%  | 0%  | 100% | 60%  | 0%  | -    | -    | 0%  | 100% | 0%  | -   | -    | 0%  | -    |
| <b>O11</b> | -    | 100% | 100% | 100% | -   | -   | 100% | 100% | -   | -    | -    | -   | 100% | -   | -   | -    | -   | -    |
